# Supplementary material for: Nitrogen-Doped Carbon Nanoparticles Derived from Silkworm Excrement as On–Off–On Fluorescent Sensors to Detect Fe(III) and Biothiols
Source: PubMed Central journal article supplement (PMC6027355; doi:10.3390/nano8060443), 2018-06-17
Supplement: nanomaterials-08-00443-s001.pdf [file nanomaterials-08-00443-s001.pdf]

# Nitrogen-doped Carbon Nanoparticles Derived from Silkworm Excrement as On-off-on Fluorescent Sensors to Detect Fe(III) and Biothiols

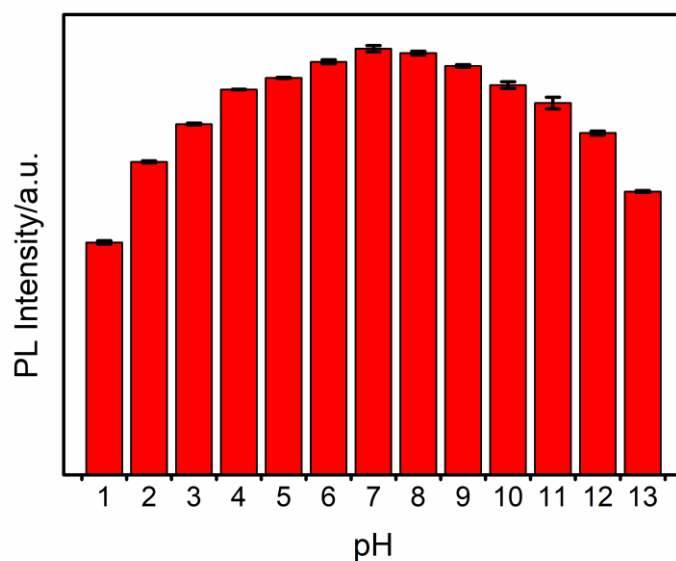

Figure S1. pH effect on PL intensity (424 nm) of N-CNPs under 340 nm excitation.

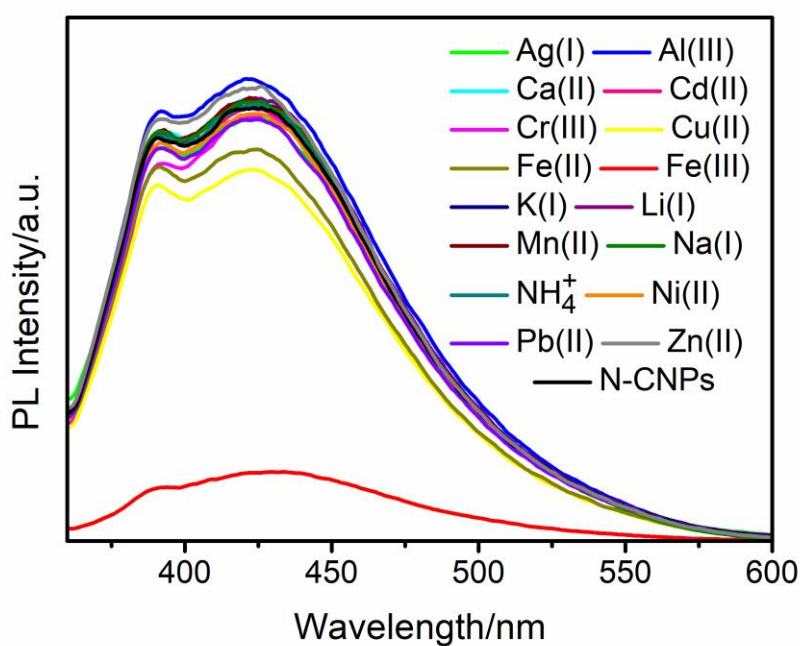

Figure S2. PL emission spectra of N-CNPs in absence and presence of various ions under 340 nm excitation.

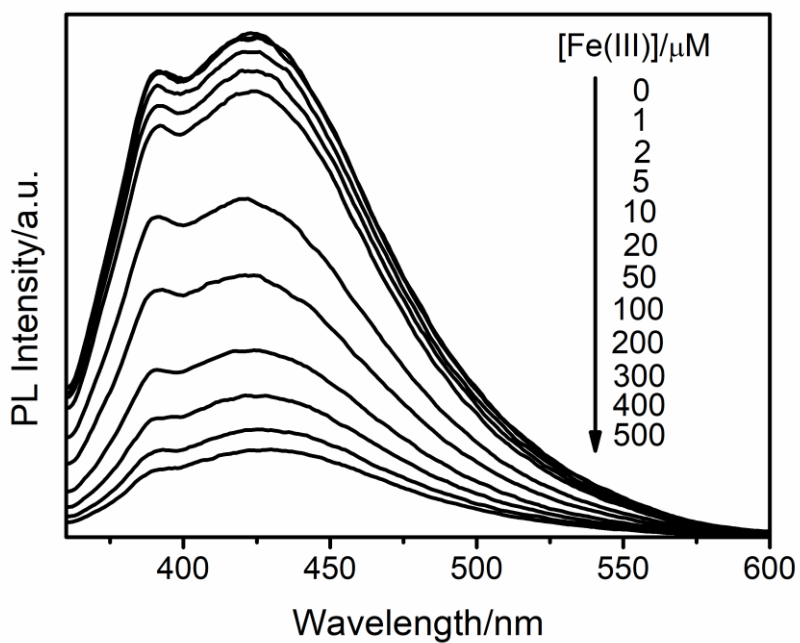

**Figure S3.** PL emission spectra of N-CNPs with different concentrations of Fe(III).

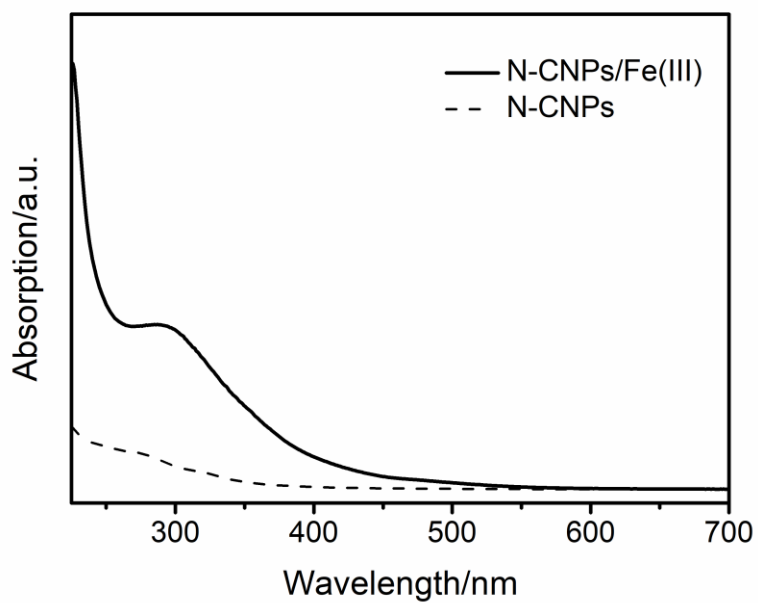

**Figure S4.** UV-vis absorption spectra of N-CNPs/Fe(III) and N-CNPs.

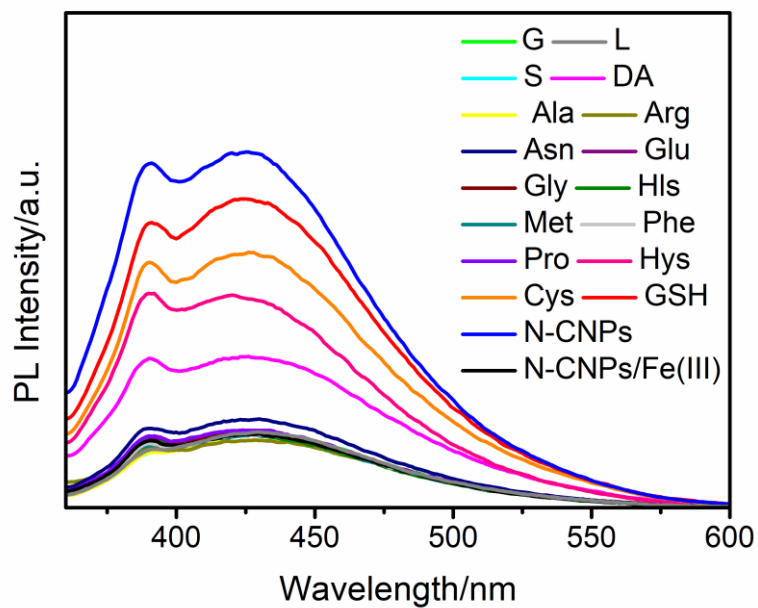

**Figure S5.** PL emission spectra of N-CNPs/Fe(III) in absence and presence of different biomolecules under 340 nm excitation.

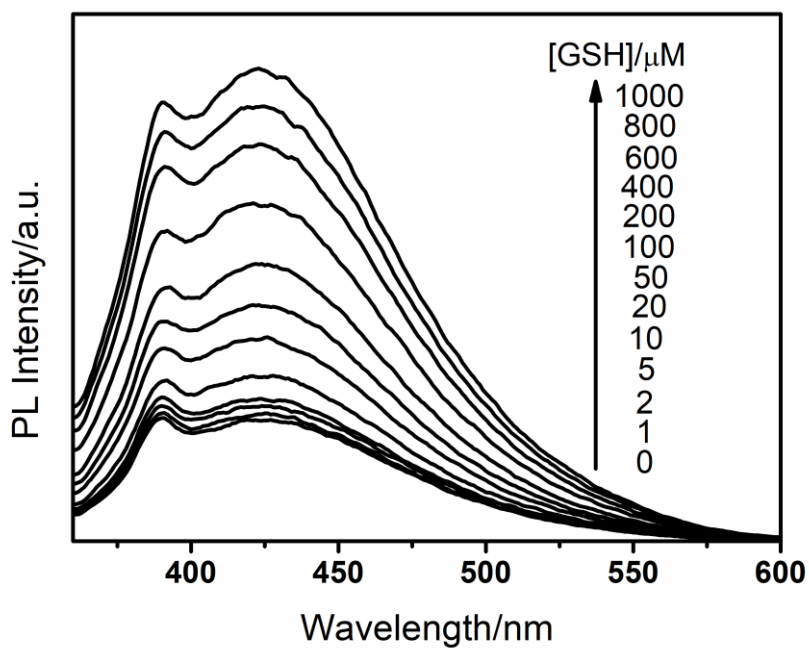

**Figure S6.** PL emission spectra of N-CNPs/Fe(III) with different concentrations of GSH.

**Table S1.** QY calculation of N-CNPs.

| Sample          | I         | A     | $\eta$ | QY    |
|-----------------|-----------|-------|--------|-------|
| Quinine sulfate | 25533.83  | 0.015 | 1.333  | 0.54  |
| N-CNPs          | 29656.837 | 0.072 | 1.333  | 0.131 |

**Table S2.** The comparison between various CNPs and CDs toward Fe(III).

| Material | LOD ( $\mu\text{M}$ ) | Linear range ( $\mu\text{M}$ ) | Response towards metal ions | Reference |
|----------|-----------------------|--------------------------------|-----------------------------|-----------|
| N-CDs    | 0.5                   | 0–150                          | Fe(III), Cr(VI)             | [S1]      |
| CDs      | 0.239                 | 0–80                           | Fe(III)                     | [S2]      |
| N-CDs    | 74                    | 200-5000                       | Fe(III)                     | [S3]      |
| FNCDs    | 0.9                   | 2–25                           | Fe(III)                     | [S4]      |
| N/P-CDs  | 0.33                  | 1–150                          | Fe(III)                     | [S5]      |
| B/N-CDs  | 1.62                  | 0-200                          | Fe(III)                     | [S6]      |
| N-CDs    | 0.52                  | 1-250                          | Fe(III)                     | [S7]      |
| N-CDs    | 10.8                  | 50-300                         | Fe(III)                     | [S8]      |
| N-CDs    | 0.38                  | 0.5–4                          | Fe(III)                     | [S9]      |
| N-GQDs   | 0.09                  | 1–1945                         | Fe(III), Hg(II)             | [S10]     |
| N-GQD    | 0.08                  | 1-70                           | Fe(III)                     | [S11]     |
| S-GQDs   | 0.0042                | 0-0.7                          | Fe(III)                     | [S12]     |
| N-CNPs   | 0.20                  | 1-500                          | Fe(III)                     | This work |

N-CDs: nitrogen-doped carbon dots, FNCDs: fluorescent nitrogen-doped carbon dots, N/P-CDs: N, P codoped carbon dots, B/N-CDs: B,N codoped carbon dots, N-GQDs: nitrogen-doped graphene quantum dots, S-GQDs: sulfur-doped graphene quantum dots.

**Table S3.** The comparison between various fluorescent sensors based on CNPs or CDs toward GSH.

| System               | LOD ( $\mu\text{M}$ ) | Linear range ( $\mu\text{M}$ ) | Reference |
|----------------------|-----------------------|--------------------------------|-----------|
| Au(III)/CDC          | 2.02                  | 0-150                          | [S13]     |
| N,S-CQDs             | 6.7                   | 0-50                           | [S14]     |
| CQDs                 | 0.943                 | 1-50                           | [S15]     |
| CDs-Br               | 0.14                  | 0-34                           | [S16]     |
| CDs-MnO <sub>2</sub> | 0.6                   | 1-200                          | [S17]     |
| N-CNPs/Fe(III)       | 0.13                  | 1~1000                         | This work |

Au(III)/CDC: Au(III) decorated carbon dot cluster; N, S-CQDs: N, S co-doped carbon quantum dots; CQDs: carbon quantum dots; CDs-Br: bromoacetyl bromide functionalized CDs.

## References

- Wang, C.; Hu, T.; Wen, Z.; Zhou, J.; Wang, X.; Wu, Q.; Wang, C. Concentration-dependent color tunability of nitrogen-doped carbon dots and their application for iron(III) detection and multicolor bioimaging. *J. Colloid. Interf. Sci.* **2018**, *521*, 33–41.
- Rao, L.; Tang, Y.; Li, Z.; Ding, X.; Liang, G.; Lu, H.; Yan, C.; Tang, K.; Yu, B. Efficient synthesis of highly fluorescent carbon dots by microreactor method and their application in Fe<sup>3+</sup> ion detection.

*Mater. Sci. Eng. C* **2017**, *81*, 213–223.

- S3. Chin, S.-F.; Tan, S.-C.; Pang, S.-C.; Ng, S.-M. Nitrogen doped carbon nanodots as fluorescent probes for selective detection and quantification of Ferric(III) ions. *Opt. Mater.* **2017**, *73*, 77–82.
- S4. Atchudan, R.; Edison, T.N.J.I.; Aseer, K.R.; Perumal, S.; Karthik, N.; Lee, Y. R. Highly fluorescent nitrogen-doped carbon dots derived from *Phyllanthus acidus* utilized as a fluorescent probe for label-free selective detection of Fe<sup>3+</sup> ions, live cell imaging and fluorescent ink. *Biosens. Bioelectron.* **2018**, *99*, 303–311.
- S5. Shangguan, J.; Huang, J.; He, D.; He, X.; Wang, K.; Ye, R.; Yang, X.; Qing, T.; Tang, J. Highly Fe<sup>3+</sup>-Selective Fluorescent Nanoprobe Based on Ultrabright N/P Codoped Carbon Dots and Its Application in Biological Samples. *Anal. Chem.* **2017**, *89*, 7477–7484.
- S6. Liu, J.; Li, J.; Xu, L.; Qiao, Y.; Chen, J. Facile Synthesis of N, B-Doped Carbon Dots and Their Application for Multisensor and Cellular Imaging. *Ind. Eng. Chem. Res.* **2017**, *56*, 3905–3912.
- S7. Song, Y.; Zhu, C.; Song, J.; Li, H.; Du, D.; Lin, Y. Drug-Derived Bright and Color-Tunable N-Doped Carbon Dots for Cell Imaging and Sensitive Detection of Fe<sup>3+</sup> in Living Cells. *ACS Appl. Mater. Interfaces* **2017**, *9*, 7399–7405.
- S8. Li, G.; Lv, N.; Bi, W.; Zhang, J.; Ni, J. Nitrogen-doped carbon dots as a fluorescence probe suitable for sensing Fe<sup>3+</sup> under acidic conditions. *New J. Chem.* **2016**, *40*, 10213–10218.
- S9. Liu, H.; Zhang, Y.; Liu, J.H.; Hou, P.; Zhou, J.; Huang, C.Z. Preparation of nitrogen-doped carbon dots with high quantum yield from Bombyx mori silk for Fe(III) ions detection. *RSC Adv.* **2017**, *7*, 50584–50590.
- S10. Ju, J.; Chen, W. Synthesis of highly fluorescent nitrogen-doped graphene quantum dots for sensitive, label-free detection of Fe(III) in aqueous media. *Biosens. Bioelectron.* **2014**, *58*, 219–225.
- S11. Xu, H.; Zhou, S.; Xiao, L.; Wang, H.; Lia, S.; Yuan, Q. Fabrication of a nitrogen-doped graphene quantum dot from MOF-derived porous carbon and its application for highly selective fluorescence detection of Fe<sup>3+</sup>. *J. Mater. Chem. C* **2015**, *3*, 291–297.
- S12. Li, S.; Li, Y.; Cao, J.; Zhu, J.; Fan, L.; Li, X. Sulfur-doped graphene quantum dots as a novel fluorescent probe for highly selective and sensitive detection of Fe<sup>3+</sup>. *Anal. Chem.* **2014**, *86*, 10201–10207.
- S13. Gu, J.; Hu, D.; Wang, W.; Zhang, Q.; Meng, Z.; Jia, X.; Xi, K. Carbon dot cluster as an efficient “off-on” fluorescent probe to detect Au(III) and glutathione. *Biosens. Bioelectron.* **2015**, *68*, 27–33.
- S14. Song, Z.; Quan, F.; Xu, Y.; Liu, M.; Cui, L.; Liu, J. Multifunctional N,S co-doped carbon quantum dots with pH- and thermo-dependent switchable fluorescent properties and highly selective detection of glutathione. *Carbon* **2016**, *104*, 169–178.
- S15. Pan, J.; Zheng, Z.; Yang, J.; Wu, Y.; Lu, F.; Chen, Y.; Gao, W. A novel and sensitive fluorescence sensor for glutathione detection by controlling the surface passivation degree of carbon quantum dots. *Talanta* **2017**, *166*, 1–7.
- S16. Yan, F.; Ye, Q.; Xu, J.; He, J.; Chen, L.; Zhou, X. Carbon dots-bromoacetyl bromide conjugates as fluorescence probe for the detection of glutathione over cysteine and homocysteine. *Sens. Actuators B Chem.* **2017**, *251*, 753–762.
- S17. Xu, Y.; Chen, X.; Chai, R.; Xing, C.; Li, H.; Yin, X.-B. *Nanoscale* **2016**, *8*, 13414–13421.
